# Supplementary material for: Optimization of WLAN associations considering handover costs
Source: Springer Nature journal article supplement (doi:10.1186/1687-1499-2012-255), 2012-08-16

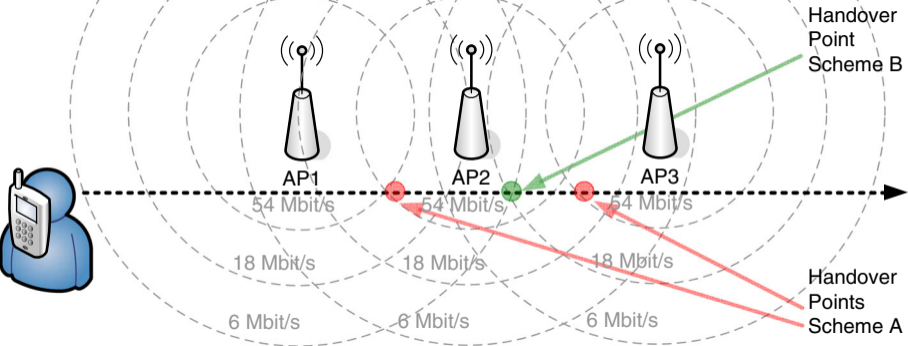

Supplement: 13638_2012_462_MOESM1_ESM.pdf [file 13638_2012_462_MOESM1_ESM.pdf]
